# Supplementary material for: Osteoarthritic chondrocytes undergo a glycolysis-related metabolic switch upon exposure to IL-1b or TNF
Source: PubMed Central journal article supplement (PMC10265918; doi:10.1186/s12964-023-01150-z), 2023-06-14

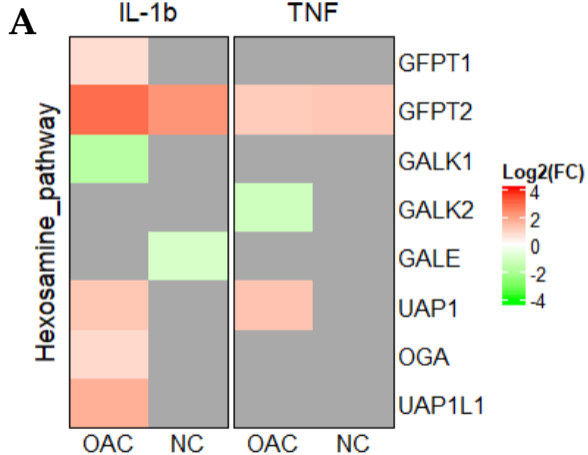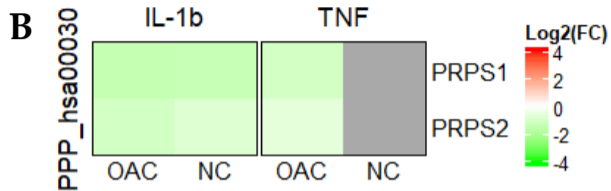

Supplement: 12964_2023_1150_MOESM2_ESM.pdf [file 12964_2023_1150_MOESM2_ESM.pdf]
